## CORRECTION

# The atlas of mouse development eHistology resource

**Elizabeth Graham, Julie Moss, Nick Burton, Yogmatee Roochun, Chris Armit, Lorna Richardson and Richard Baldock**

MRC Human Genetics Unit, IGMM, University of Edinburgh, Crewe Road, Edinburgh EH4 2XU, UK.

There was an error published in *Development* **142**, 1909-1911.

Author Yogmatee Roochun was omitted. The corrected author list appears above.

The authors apologise to readers for this mistake.
